# Supplementary material for: Proteomic Profiling and In Silico Characterization of the Secretome of Anisakis simplex Sensu Stricto L3 Larvae
Source: MDPI journal article supplement (doi:10.3390/pathogens11020246), 2022-02-14
Supplement: s1 [file s1]

**Supplementary Table S1.** The databases, software tools, and servers used for bioinformatics analyses in the present study.

| Bioinformatics analysis of secretome proteins of <i>A. simplex</i>                                                | Database                                                                                                                                | Bioinformatics tool                                         |
|-------------------------------------------------------------------------------------------------------------------|-----------------------------------------------------------------------------------------------------------------------------------------|-------------------------------------------------------------|
| Estimation of theoretical isoelectric point                                                                       | <sup>1</sup>                                                                                                                            | Mascot server (ver. 2.5)                                    |
| Estimation of theoretical molecular weight                                                                        | -                                                                                                                                       | Mascot server (ver. 2.5)                                    |
| Gene ontology analysis                                                                                            | -                                                                                                                                       | OmicsBox (ver. 1.4.12)                                      |
| InterPro protein family classification                                                                            | -                                                                                                                                       | OmicsBox (ver. 1.4.12)                                      |
| Enzyme identification                                                                                             | -                                                                                                                                       | OmicsBox (ver. 1.4.12)                                      |
| Identification of proteases and protease inhibitors                                                               | MEROPS database (release 12.3)                                                                                                          | BLASTP search using OmicsBox (ver. 1.4.12)                  |
| Prediction of secretory pathway                                                                                   | -                                                                                                                                       | OutCyte 1.0 server                                          |
| Prediction of extracellular vesicles-associated proteins                                                          | Extracellular vesicles-associated proteins detected in the secretomes of <i>A. suum</i> , <i>B. malayi</i> , and <i>N. brasiliensis</i> | BLASTP search using OmicsBox (ver. 1.4.12)                  |
| Analysis of the similarity between <i>A. simplex</i> secretome proteins and secretome proteins of other nematodes | Secretome proteins of <i>S. lupi</i> , <i>A. caninum</i> , <i>A. suum</i> , and <i>T. canis</i>                                         | BLASTP search using OmicsBox (ver. 1.4.12)                  |
| Prediction of proteins essential for life                                                                         | Reference eukaryote proteins from the DEG database (release 09.01.2020)                                                                 | BLASTP search using OmicsBox (ver. 1.4.12)                  |
| Gene Ontology enrichment analysis                                                                                 | <i>A. simplex</i> proteome (UniProt ID: UP000036680)                                                                                    | Two-tailed Fisher's exact test using OmicsBox (ver. 1.4.12) |
| Enzymes enrichment analysis                                                                                       | <i>A. simplex</i> proteome (UniProt ID: UP000036680)                                                                                    | Two-tailed Fisher's exact test using OmicsBox (ver. 1.4.12) |
| KEGG pathways identification                                                                                      | -                                                                                                                                       | KOBAS 3.0 server                                            |
| KEGG pathways enrichment analysis                                                                                 | <i>A. simplex</i> proteome (UniProt ID: UP000036680)                                                                                    | Fisher's exact test using KOBAS 3.0 server                  |
| Identification of potential pathogenicity-related proteins                                                        | ProtVirDB, Victors, VFDB                                                                                                                | BLASTP search using OmicsBox (ver. 1.4.12)                  |
| Identification of potential allergens                                                                             | Food Allergy Research and Resource Program (FARRP) AllergenOnline.org database (ver. 21)                                                | BLASTP search using OmicsBox (ver. 1.4.12)                  |
| Confirmatory analysis of identified potential allergens                                                           | -                                                                                                                                       | AllerCatPro server (ver. 1.8)                               |
| Prediction of 3D structures of proteins                                                                           | -                                                                                                                                       | Phyre2 server                                               |
| Improvement of predicted 3D protein structures                                                                    | -                                                                                                                                       | 3Drefine server                                             |
| Visualization of predicted 3D protein structures                                                                  | -                                                                                                                                       | PyMOL Molecular Graphics System (ver. 2.0)                  |
| Prediction of interactions between <i>A. simplex</i> proteins                                                     | -                                                                                                                                       | STRING server (ver. 11.0)                                   |
| Prediction of host–parasite protein interactions                                                                  | <i>Homo sapiens</i> proteome (UniProt ID: UP000005640); <i>Clupea harengus</i> proteome (UniProt ID: UP000515152)                       | HPIDB 3.0 server                                            |
| Visualization and analysis of predicted interactomes                                                              | -                                                                                                                                       | Cytoscape (ver. 3.9.0)                                      |

<sup>1</sup> Not applicable
